# Supplementary material for: Biodegradable porous polymeric drug as a drug delivery system: alleviation of doxorubicin-induced cardiotoxicityviapassive targeted release
Source: Royal Society of Chemistry journal article supplement (doi:10.1039/d2ra07410a), 2023-01-01
Supplement: d2ra07410a2.pdf [file d2ra07410a2.pdf]

Supplementary Materials :

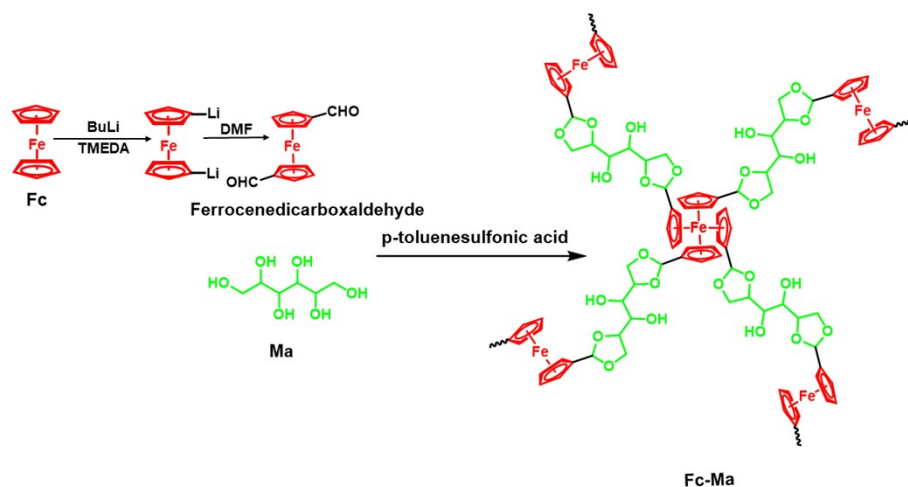

Figure S1. Synthesis of the Fc-Ma.

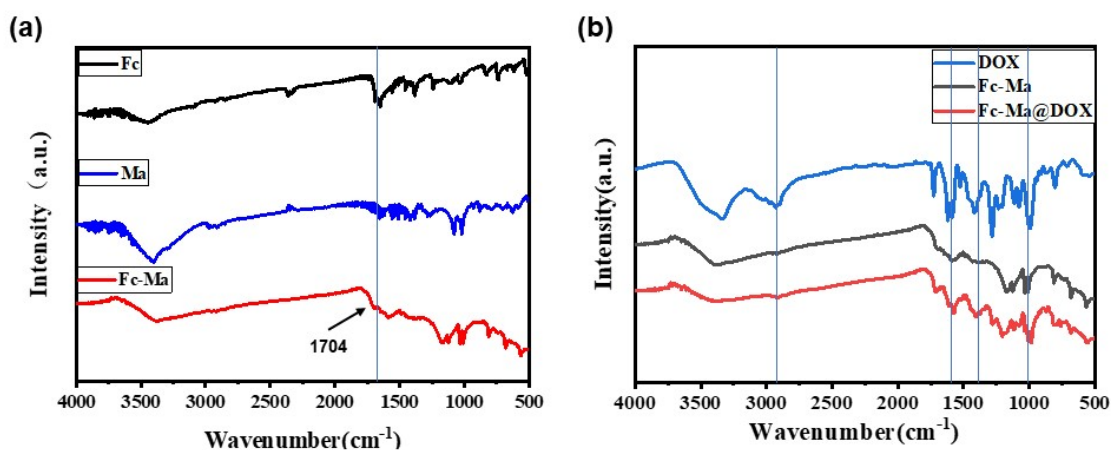

Figure S2. (a) FTIR spectra of prepared precursors and corresponding Fc-Ma; (b) FTIR spectra of Fc-Ma, DOX, and Fc-Ma-DOX.

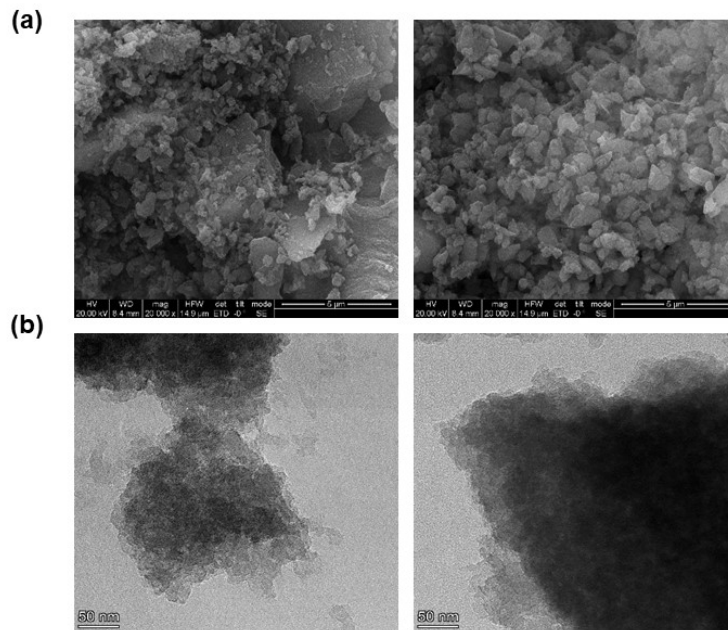

**Figure S3.** (a) SEM of Fc-Ma and Fc-Ma-DOX at a scale bar of 5 μm respectively; (b) TEM of Fc-Ma and Fc-Ma-DOX at a scale bar of 50 nm respectively.

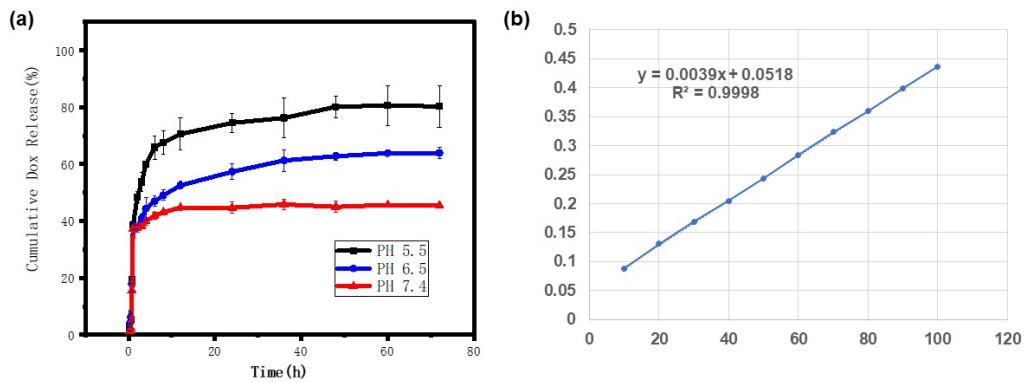

**Figure S4.** (a) In vitro drug release profiles of Fc-Ma-DOX; (b) DOX standard curves.
