# Supplementary figures and images for: Biodegradable porous polymeric drug as a drug delivery system: alleviation of doxorubicin-induced cardiotoxicityviapassive targeted release
Source: Royal Society of Chemistry journal article supplement (doi:10.1039/d2ra07410a), 2023-01-01

Figure S1  
Mf2

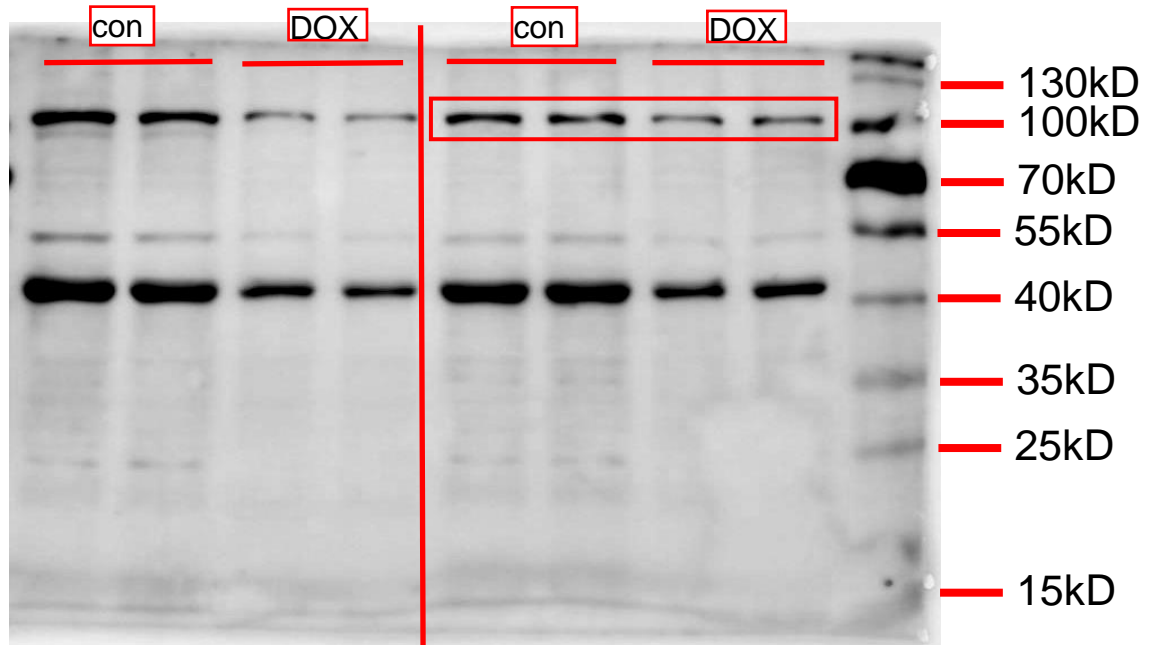

HO-1

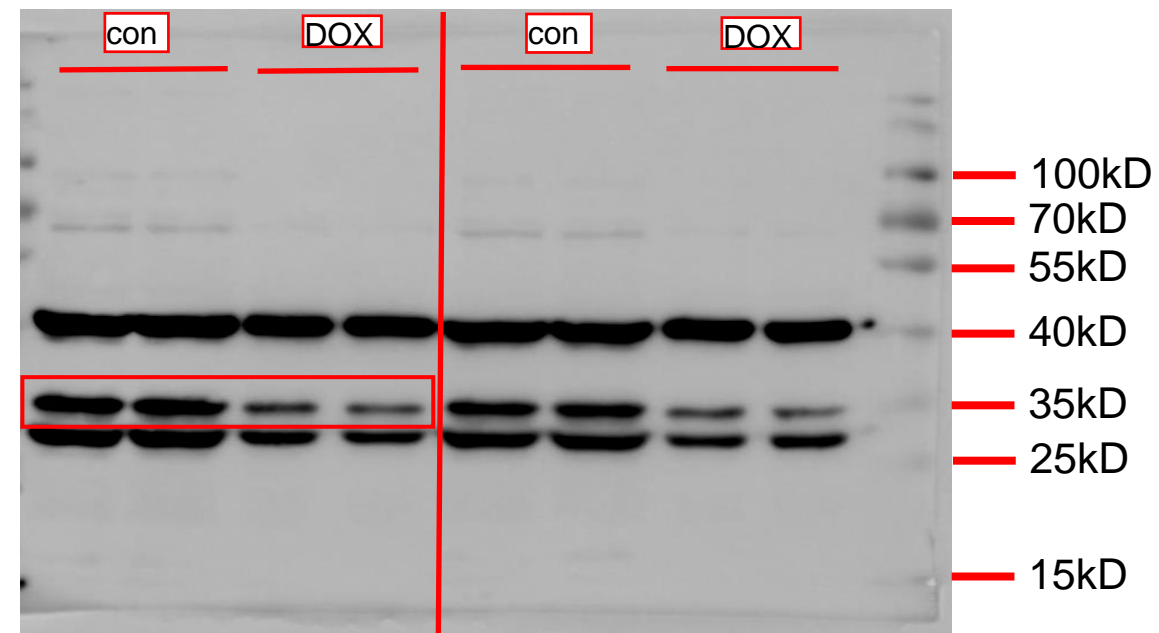

NQO-1

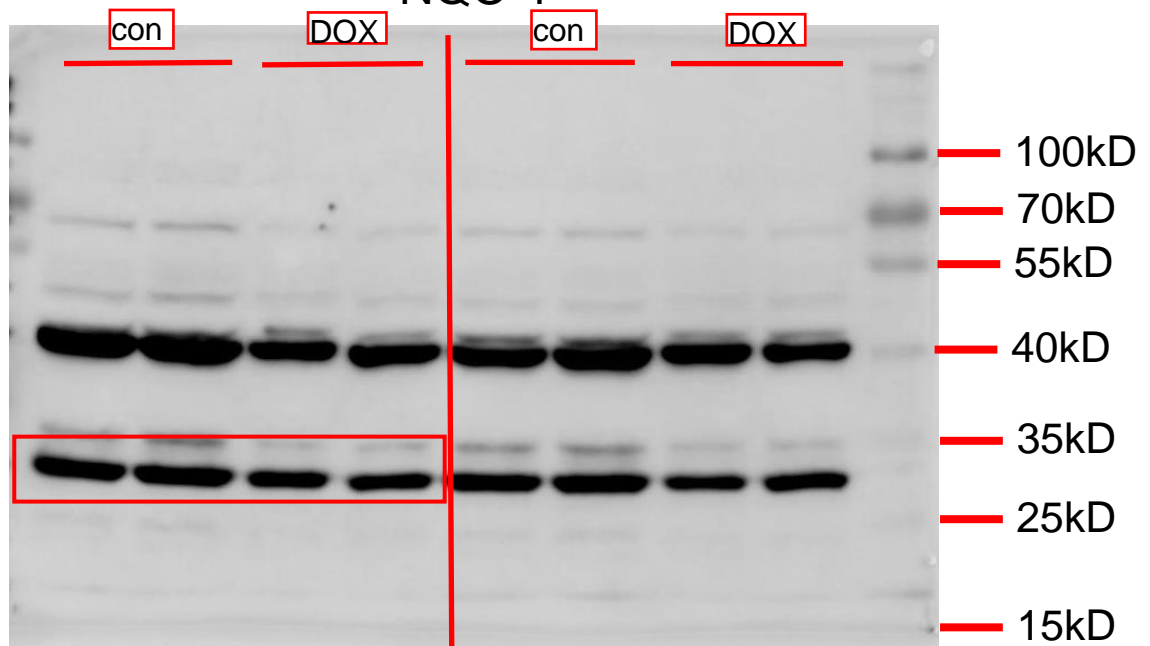

GAPDH

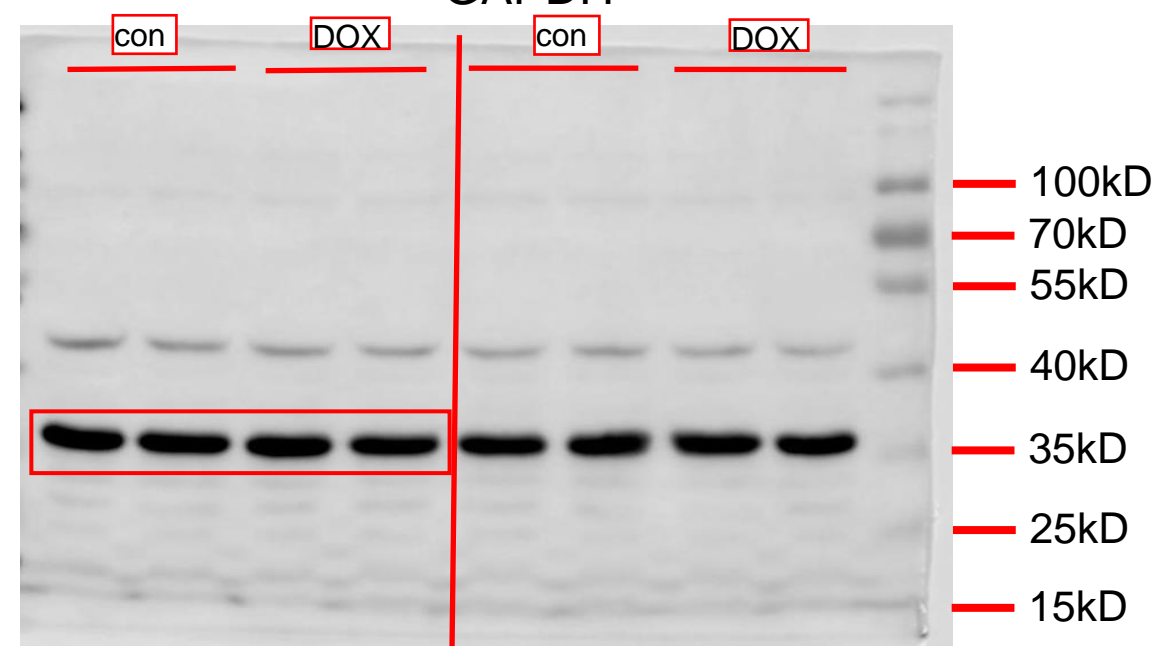

Figure5f

Nrf-2

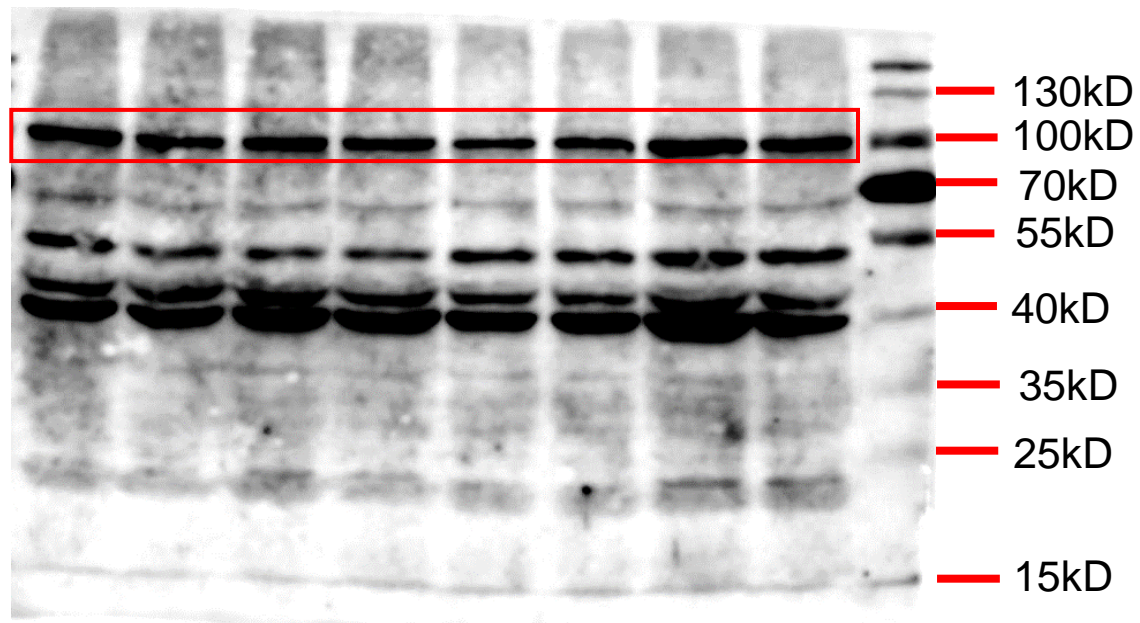

HO-1

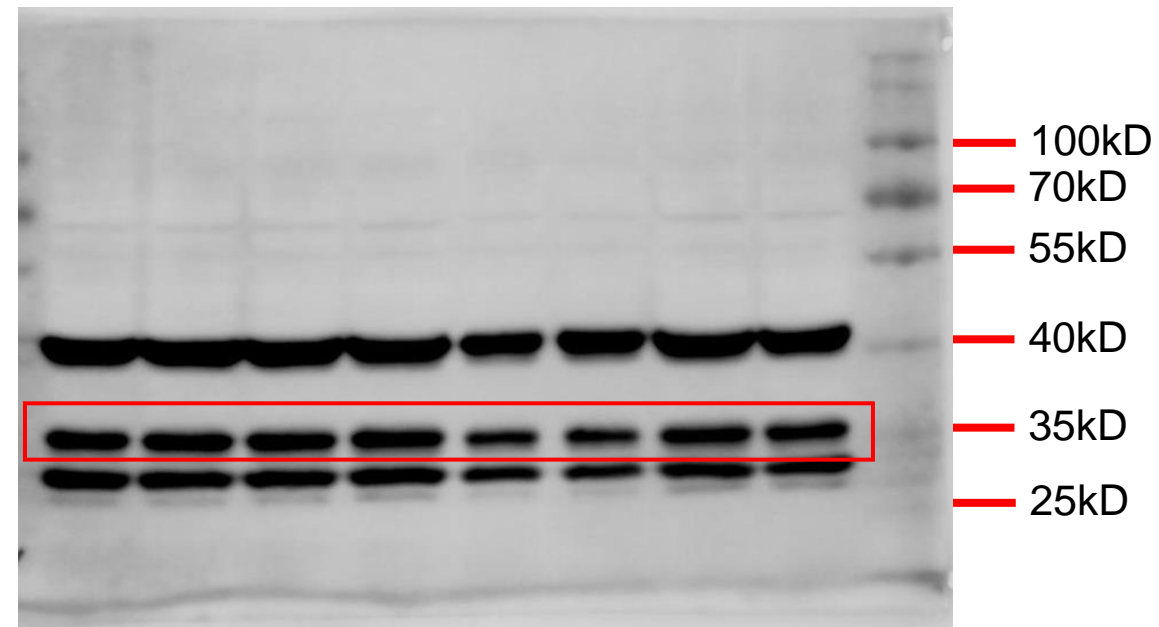

NQO-1

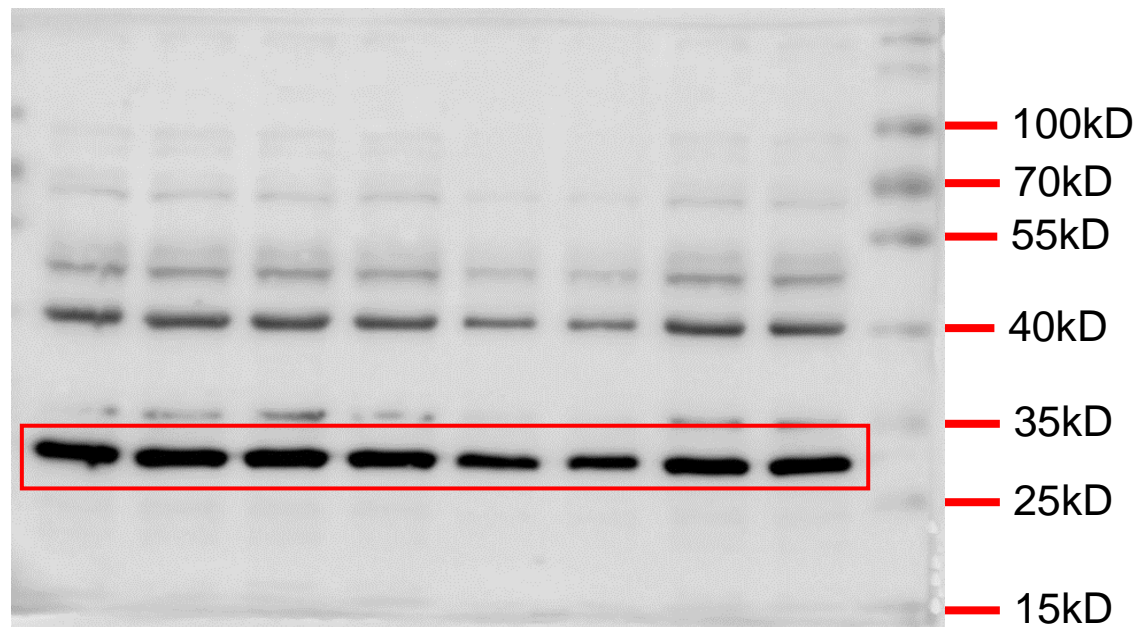

GAPDH

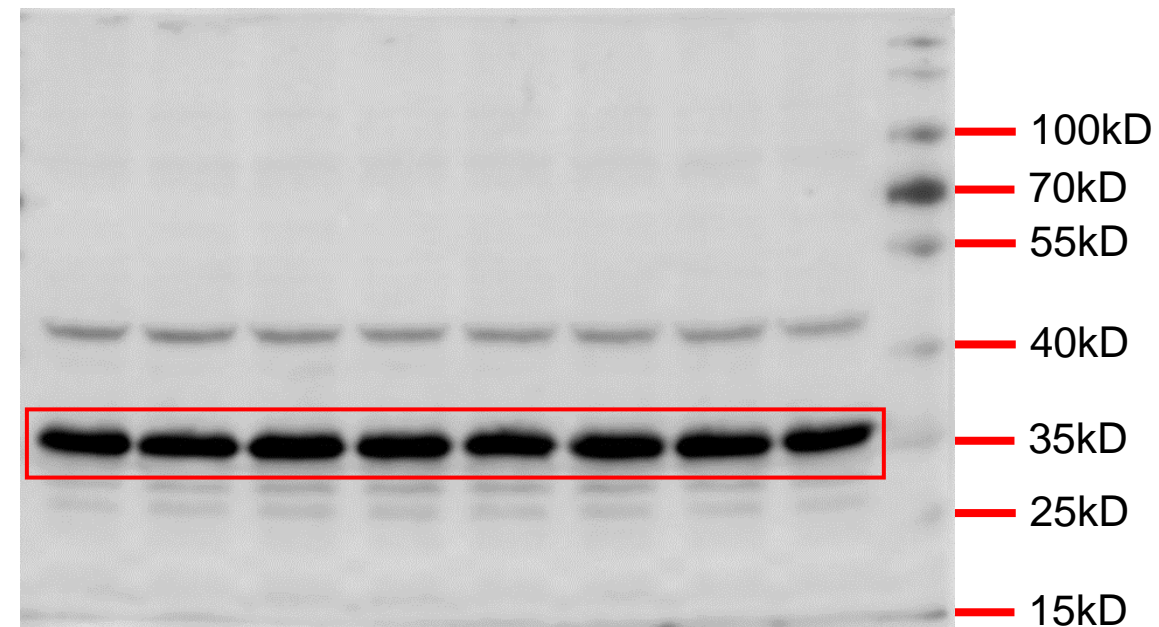

**Figure7b**

**Nrf-2**

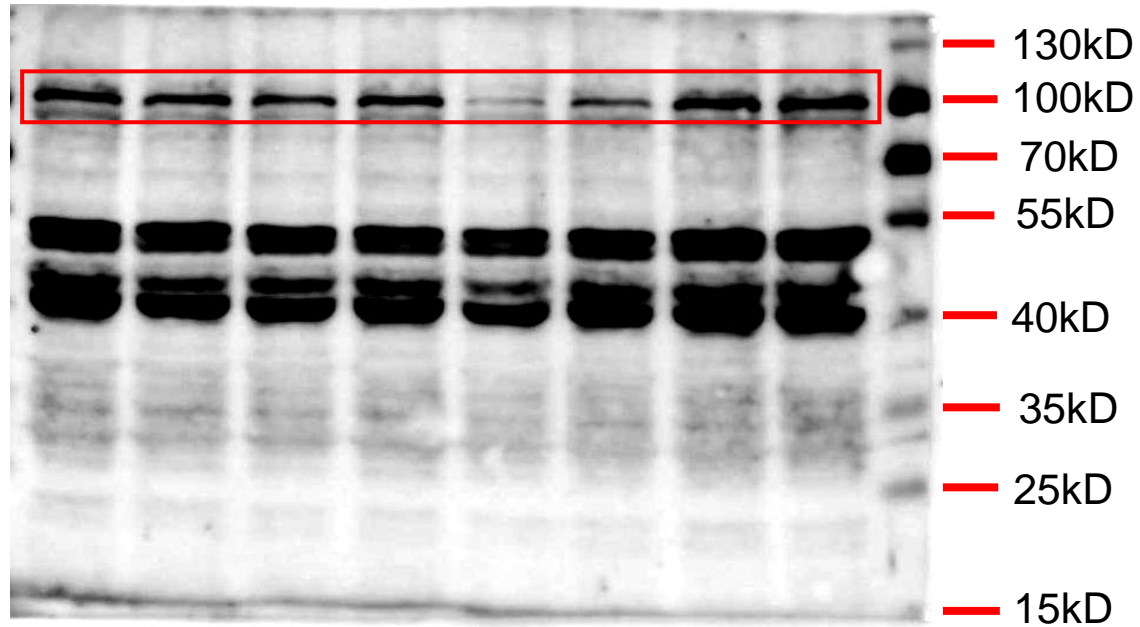

**HO-1**

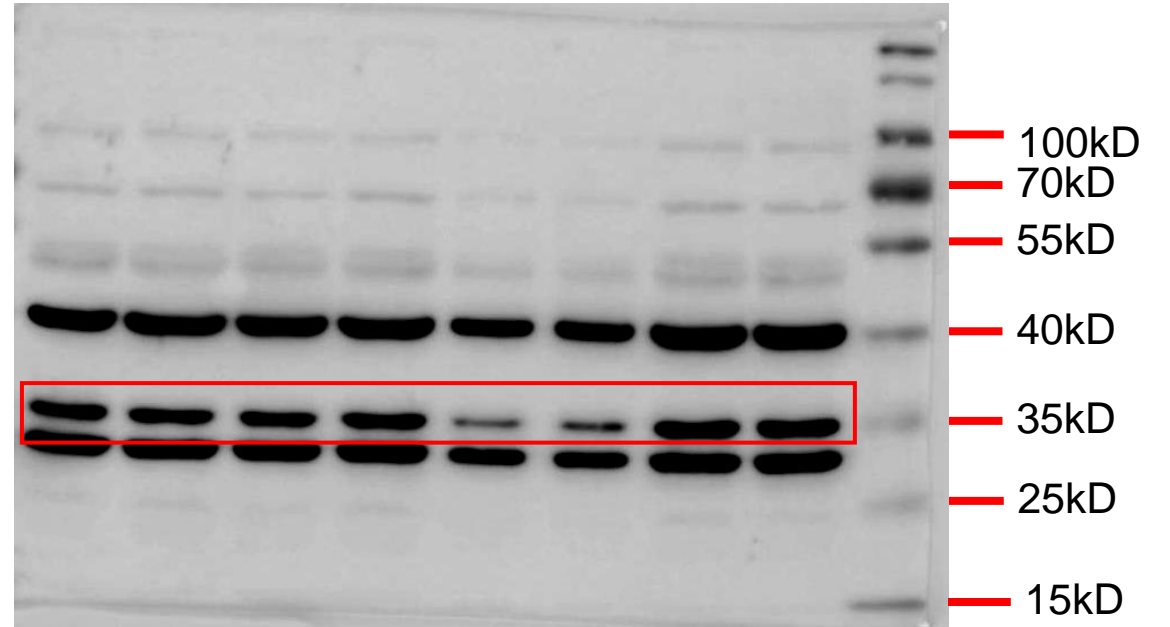

**NQO-1**

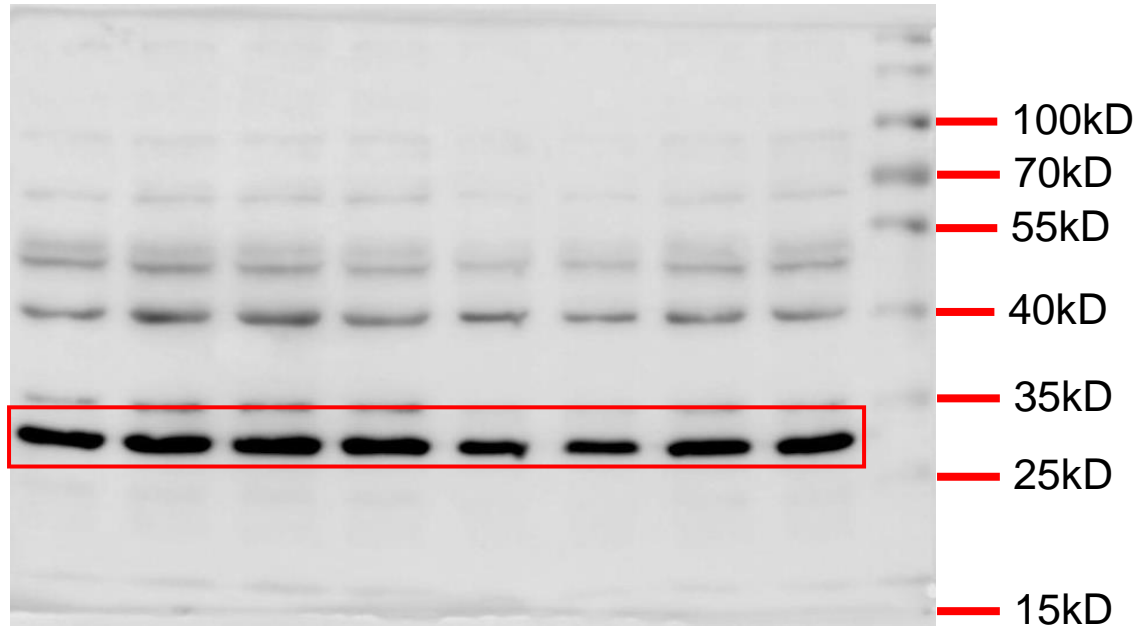

**GAPDH**

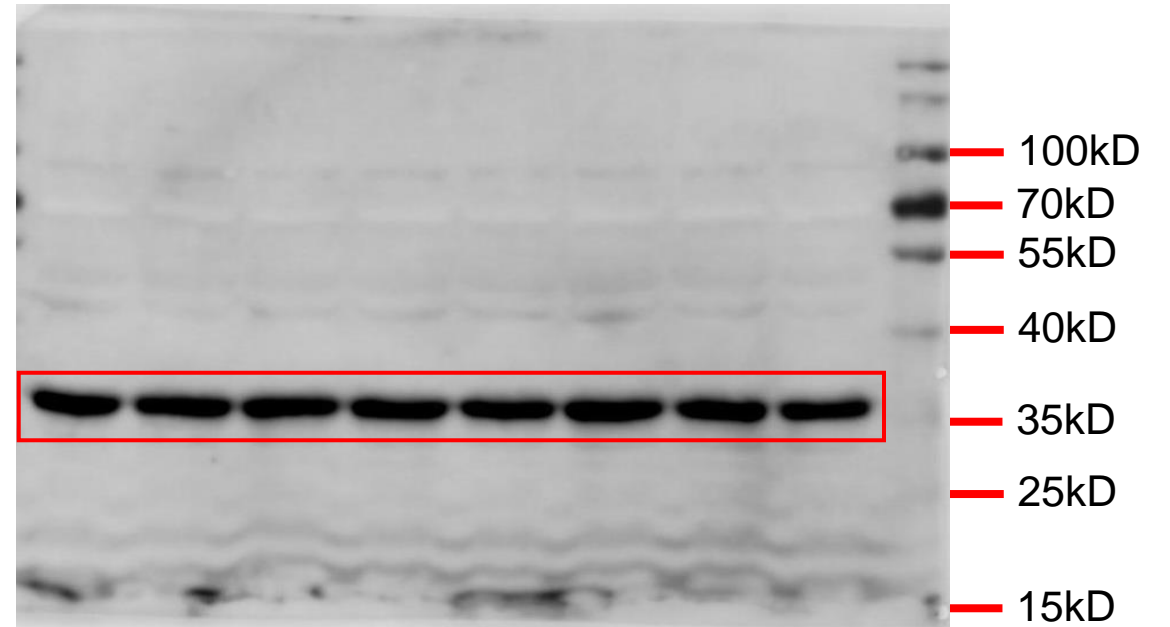

Supplement: d2ra07410a1.pdf [file d2ra07410a1.pdf]
